# Supplementary material
Source: PubMed Central journal article supplement (PMC7959985)
Supplement: 16-00384.pdf [file 16-00384.pdf]

**On-line Table 1: Baseline characteristics of patients with ≥3 interventions**

| Case No. | Sex | Age (yr) | HH/Fisher | GCS at Admission | Aneurysm Location | Further Aneurysms | Aneurysm Obliteration | No. of Treatments | No. of Vessels Treated | PTA | Complications       |
|----------|-----|----------|-----------|------------------|-------------------|-------------------|-----------------------|-------------------|------------------------|-----|---------------------|
| 1        | F   | 41       | 3/3       | 8                | Anterior          | N                 | Coil                  | 6                 | 14                     | Y   | Dissection          |
| 2        | F   | 38       | 3/3       | 14               | Anterior          | N                 | Coil                  | 3                 | 6                      | N   | None                |
| 3        | F   | 49       | 3/3       | 14               | Posterior         | Y                 | Coil                  | 3                 | 8                      | Y   | None                |
| 4        | M   | 56       | 2a/3      | 15               | Anterior          | N                 | Clip                  | 3                 | 6                      | Y   | None                |
| 5        | F   | 52       | 3/3       | 13               | Anterior          | Y                 | Coil                  | 5                 | 8                      | Y   | Pseudoaneurysm      |
| 6        | F   | 60       | 2/2       | 15               | Anterior          | N                 | Clip                  | 5                 | 8                      | N   | None                |
| 7        | M   | 53       | 3/3       | 14               | Anterior          | Y                 | Coil                  | 5                 | 6                      | N   | None                |
| 8        | M   | 51       | 3/3       | 13               | Posterior         | Y                 | Coil                  | 4                 | 6                      | N   | None                |
| 9        | F   | 59       | 3/3       | 5                | Anterior          | Y                 | Coil                  | 4                 | 12                     | N   | None                |
| 10       | F   | 48       | 4/3       | 10               | Anterior          | Y                 | Coil                  | 4                 | 7                      | Y   | Dissection/stenting |
| 11       | F   | 40       | 2a/3      | 14               | Posterior         | N                 | Coil                  | 4                 | 11                     | Y   | None                |
| 12       | F   | 59       | 2a/3      | 15               | Posterior         | N                 | Coil                  | 3                 | 4                      | Y   | None                |
| 13       | F   | 40       | 2a/3      | 15               | Posterior         | N                 | Coil                  | 3                 | 4                      | Y   | Rupture             |
| 14       | F   | 53       | 5/3       | 5                | Anterior          | N                 | Coil                  | 3                 | 5                      | Y   | None                |
| 15       | F   | 53       | 2a/3      | 15               | Anterior          | N                 | Coil                  | 4                 | 6                      | N   | None                |
| 16       | F   | 55       | 4/3       | 12               | Anterior          | N                 | Coil                  | 3                 | 5                      | N   | None                |
| 17       | F   | 56       | 4/3       | 6                | Anterior          | N                 | Coil                  | 3                 | 5                      | Y   | None                |
| 18       | F   | 48       | 2a/3      | 14               | Posterior         | Y                 | Coil                  | 3                 | 11                     | Y   | None                |
| 19       | F   | 53       | 4/3       | 8                | Anterior          | Y                 | Clip                  | 3                 | 6                      | N   | None                |
| 20       | F   | 59       | 3/3       | 12               | Anterior          | N                 | Coil                  | 3                 | 8                      | N   | None                |
| 21       | F   | 50       | 5/3       | 8                | Anterior          | N                 | Coil                  | 3                 | 9                      | Y   | Dissection          |
| 22       | M   | 77       | 2a/3      | 14               | Anterior          | N                 | Coil                  | 3                 | 7                      | N   | None                |
| 23       | M   | 51       | 3/3       | 13               | Posterior         | Y                 | Coil                  | 4                 | 5                      | N   | None                |
| 24       | F   | 59       | 3/3       | 10               | Anterior          | Y                 | Coil                  | 4                 | 12                     | N   | None                |
| 25       | F   | 48       | 2a/3      | 14               | Anterior          | Y                 | Clip                  | 7                 | 13                     | Y   | None                |
| 26       | F   | 66       | 5/3       | 8                | Posterior         | Y                 | Coil                  | 4                 | 10                     | N   | None                |
| 27       | F   | 49       | 2a/3      | 15               | Posterior         | N                 | Coil                  | 6                 | 11                     | Y   | Dissection          |
| 28       | M   | 48       | 3/3       | 13               | Anterior          | N                 | Coil                  | 5                 | 14                     | Y   | Dissection          |
| 29       | F   | 49       | 5/3       | 3                | Anterior          | N                 | Clip                  | 6                 | 16                     | N   | None                |
| 30       | M   | 61       | 5/3       | 4                | Anterior          | Y                 | Coil                  | 6                 | 15                     | Y   | None                |
| 31       | F   | 34       | 3/3       | 12               | Posterior         | N                 | Coil                  | 10                | 40                     | Y   | None                |

**Note:**—Y indicates yes; N, no.

**On-line Table 2: Functional outcome and infarcts in patients with  $\geq 3$  interventions**

| Case No. | GCS on Discharge | GCS at Last FU | mRS on Discharge | mRS on Last FU | Length of FU (mo) | Most Disturbing Effect              | Employment (%) | Stroke Confirmed by |  | New Infarcted Area                                        | Related Functional Deficit |
|----------|------------------|----------------|------------------|----------------|-------------------|-------------------------------------|----------------|---------------------|--|-----------------------------------------------------------|----------------------------|
|          |                  |                |                  |                |                   |                                     |                |                     |  |                                                           |                            |
| 1        | 14               | 15             | 4                | 2              | 11                | Headache, gaucheness                | 50             | CT                  |  | Caudate nucleus                                           | N                          |
| 2        | 15               | 15             | 3                | 1              | 15                | Headache, fatigue                   | 80             | CT                  |  | None                                                      | N                          |
| 3        | 3                | 3              | 6                | 6              | 12                | NA                                  | NA             | MRI                 |  | Both ACA and right MCA territories                        | Y                          |
| 4        | 15               | 15             | 3                | 2              | 21                | Fatigue                             | 50             | CT                  |  | Internal capsule, right                                   | N                          |
| 5        | 3                | 3              | 6                | 6              | 17                | NA                                  | NA             | MRI                 |  | Watershed stroke MCA/ACA, both sides                      | Y                          |
| 6        | 15               | 15             | 3                | 2              | 22                | Fatigue                             | 0              | CT                  |  | None                                                      | N                          |
| 7        | 15               | 15             | 4                | 2              | 3                 | Fatigue                             | 50             | CT                  |  | Small ACA territory, left                                 | N                          |
| 8        | 15               | 15             | 3                | 2              | 3                 | Headache                            | 50             | CT                  |  | None                                                      | N                          |
| 9        | 14               | 15             | 4                | 2              | 1                 | Neglect, hemianopsia                | 50             | MRI                 |  | Thalamus, left                                            | Y                          |
| 10       | 12               | 12             | 5                | 5              | 12                | Dependent state                     | 0              | MRI                 |  | Multiple focal infarctions                                | Y                          |
| 11       | 15               | 15             | 3                | 2              | 19                | Fatigue                             | 80             | CT                  |  | None                                                      | N                          |
| 12       | 15               | 15             | 2                | 1              | 3                 | Sensitivity to noise                | Retired        | CT                  |  | None                                                      | N                          |
| 13       | 15               | 15             | 2                | 1              | 6                 | Left sensory hemisyndrome           | 30             | MRI                 |  | MCA territory, left                                       | Y                          |
| 14       | 12               | 15             | 4                | 1              | 7                 | Fatigue, slight dysarthria          | 90             | CT                  |  | Watershed stroke MCA/ACA, left                            | Y                          |
| 15       | 15               | 15             | 4                | 3              | 3                 | Brachiofacial hemisyndrome          | 0              | CT                  |  | MCA and ACA territories, right side                       | Y                          |
| 16       | 14               | 15             | 5                | 6              | 13                | NA                                  | NA             | CT                  |  | Basal ganglia, right side                                 | Y                          |
| 17       | 3                | 3              | 6                | 6              | 3                 | NA                                  | NA             | MRI                 |  | MCA and ACA territories, right side                       | Y                          |
| 18       | 3                | 3              | 6                | 6              | 3                 | NA                                  | NA             | MRI                 |  | Bilateral infarctions ACA and MCA territories             | Y                          |
| 19       | 11               | 3              | 5                | 6              | 6                 | NA                                  | NA             | MRI                 |  | Watershed stroke MCA/ACA, left                            | Y                          |
| 20       | 3                | 3              | 6                | 6              | 3                 | NA                                  | NA             | MRI                 |  | ACA territories, both sides                               | Y                          |
| 21       | 3                | 3              | 6                | 6              | 3                 | NA                                  | NA             | MRI                 |  | ACA territories, both sides, and MCA territory, left side | Y                          |
| 22       | 14               | 3              | 4                | 6              | 18                | NA                                  | NA             | CT                  |  | Multifocal lesions ACA territories, both sides            | Y                          |
| 23       | 15               | 15             | 2                | 1              | 15                | Fatigue, hemianopsia right          | 80             | CT                  |  | None                                                      | N                          |
| 24       | 15               | 15             | 2                | 1              | 9                 | Fatigue                             | 50             | MRI                 |  | Small watershed stroke MCA/PCA, left                      | N                          |
| 25       | 15               | 15             | 3                | 2              | 9                 | Residual motor aphasia              | 60             | MRI                 |  | Left centrum semiovale                                    | Y                          |
| 26       | 15               | 15             | 2                | 1              | 12                | Lack of drive                       | Retired        | MRI                 |  | None                                                      | N                          |
| 27       | 14               | 15             | 3                | 2              | 1                 | Attention deficit disorder          | 0              | MRI                 |  | None                                                      | N                          |
| 28       | 14               | 15             | 3                | 2              | 16                | Fatigue, depression, excitability   | 50             | MRI                 |  | ACA, left, and frontal left territories                   | N                          |
| 29       | 9                | 11             | 5                | 4              | 4                 | Minimally conscious state           | 0              | MRI                 |  | Caudate nucleus and insular right territories             | Y                          |
| 30       | 13               | 15             | 4                | 2              | 8                 | Residual short-term memory deficits | 30             | MRI                 |  | Bifrontal and insular left territories                    | Y                          |
| 31       | 10               | 15             | 5                | 4              | 5                 | Spasticity                          | 0              | MRI                 |  | ACA territories, both sides                               | Y                          |

**Note:**—NA indicates not applicable; ACA, anterior cerebral artery; PCA, posterior cerebral artery; FU, follow-up; Y, yes; N, no.
